# Supplementary material for: Synthesis of Tin Oxide Nanoparticles from E-Waste for Photocatalytic Mixed-Dye Degradation under Sunlight
Source: PubMed Central journal article supplement — ACS Omega. 2024 Dec 8;9(52):51136–45. doi: 10.1021/acsomega.4c06548 (PMC11696421; doi:10.1021/acsomega.4c06548), 2024-12-08
Supplement: ao4c06548_si_001.pdf [file ao4c06548_si_001.pdf]

## Supporting Information

### **Synthesis of Tin Oxide Nanoparticles from E-waste for Photocatalytic Mixed Dye Degradation under Sunlight**

*Mandira Ghosh<sup>a</sup>, Debdyuti Mukherjee<sup>b</sup>, Celin Selvaraj<sup>a</sup>, Pritam Ghosh<sup>c</sup>, Sujoy Sarkar<sup>a,d\*</sup>*

<sup>a</sup> Department of Chemistry, School of Advanced Sciences, Vellore Institute of Technology, Chennai Campus, Vandalur-Kelambakkam Road, Chennai, Tamil Nadu, India 600127

<sup>b</sup> Centre for Fuel Cell Technology (CFCT), International Advanced Research Centre for Powder Metallurgy and New Materials (ARCI), IIT-M Research Park, Taramani, Chennai, Tamil Nadu, India 600113

<sup>c</sup> Department of Chemistry, Humboldt-Universität zu Berlin, Brook-Taylor-Straße 2, 12489 Berlin, Germany.

<sup>d</sup> Electric Vehicle Incubation, Testing and Research Centre (EVIT-RC), Vellore Institute of Technology, Chennai Campus, Vandalur-Kelambakkam Road, Chennai, Tamil Nadu, India 600127

E-mail: [sujoy.sarkar@vit.ac.in](mailto:sujoy.sarkar@vit.ac.in)

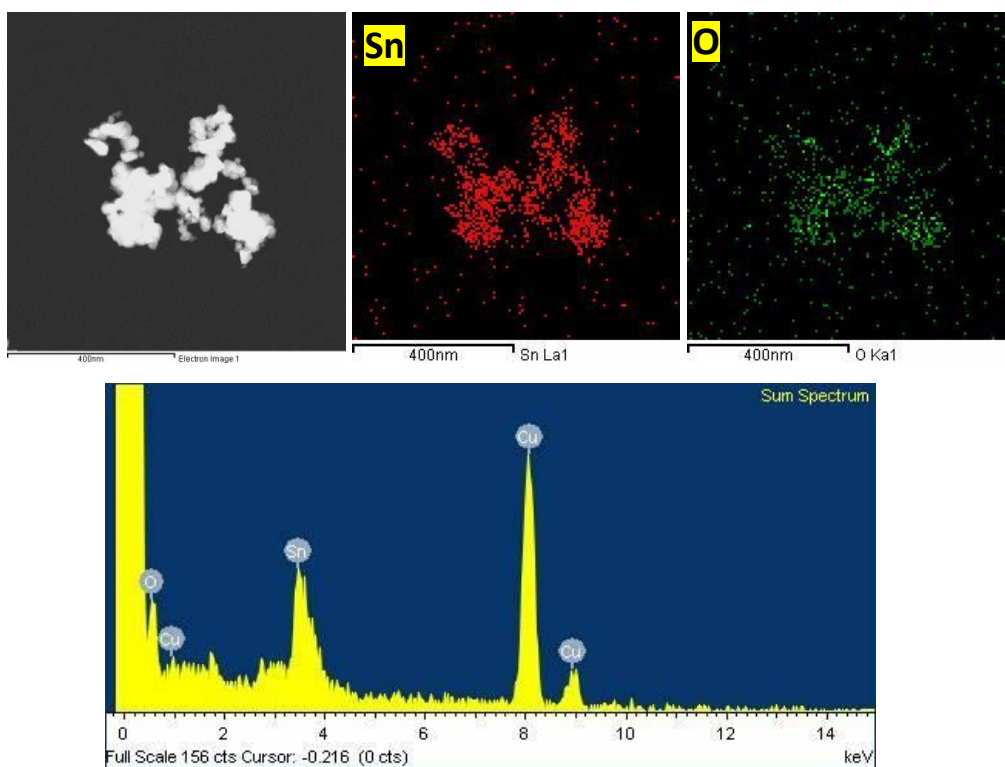

| Element | Weight % | Atomic % | Net Int. | Error % | Kratio | Z      | A      | F      |
|---------|----------|----------|----------|---------|--------|--------|--------|--------|
| O K     | 17.05    | 60.40    | 2831.21  | 7.46    | 0.1303 | 1.4737 | 0.5186 | 1.0000 |
| SnL     | 82.95    | 39.60    | 3552.05  | 3.92    | 0.7549 | 0.8981 | 1.0134 | 1.0000 |

**Figure S1:** Elemental mapping and EDX of as-synthesized SnO<sub>2</sub> nanoparticles. Atomic % of Sn and O is tabulated.

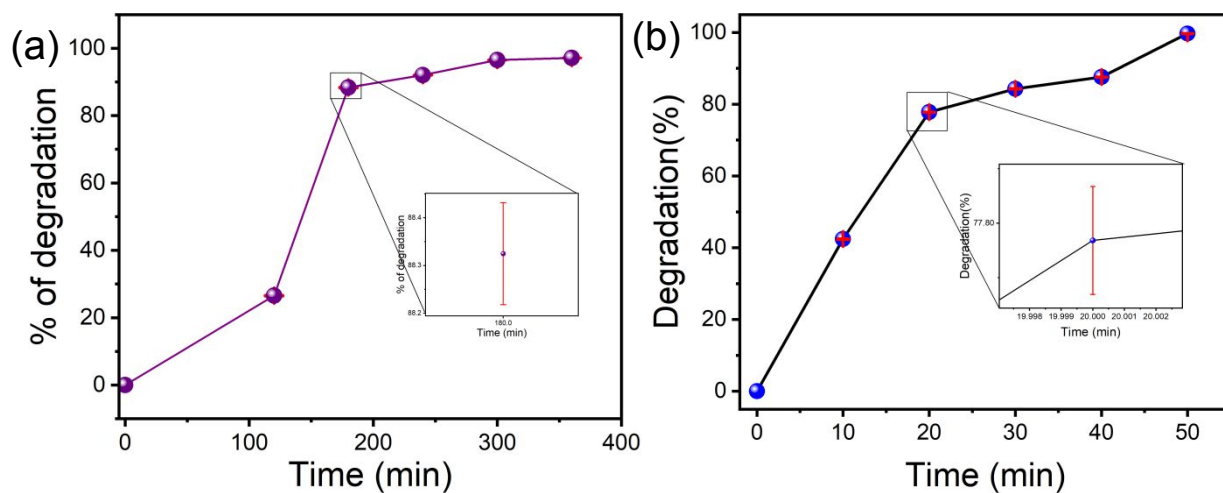

**Figure S2:** Photocatalytic dye degradation reactions are repeated three times for (a) MB and (b) EY. The error bar is zoomed in and kept inside.

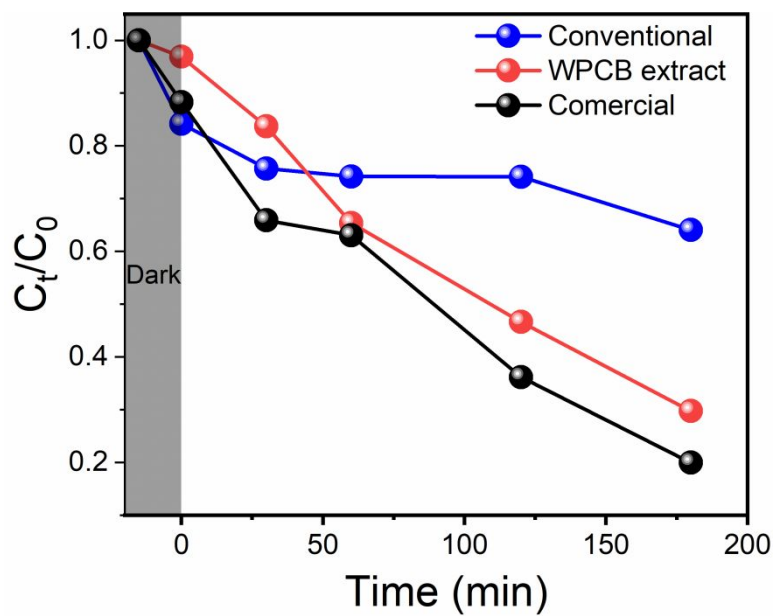

**Figure S3:** Photocatalytic activity of MB degradation under sunlight compared with as-synthesized SnO<sub>2</sub> nanoparticles, commercial SnO<sub>2</sub>, and SnO<sub>2</sub> prepared by conventional method (Hydrothermal).

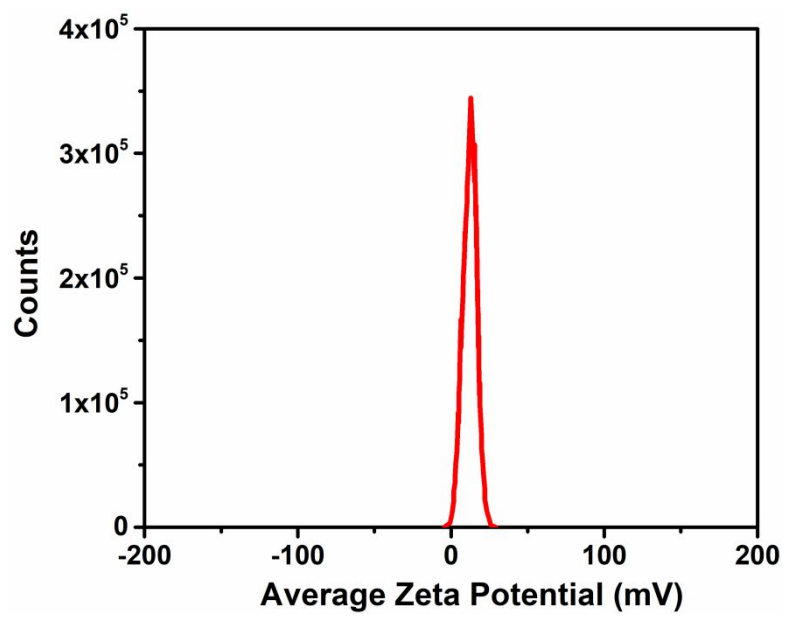

**Figure S4:** Zeta potential of as-synthesized SnO<sub>2</sub> nanoparticles.

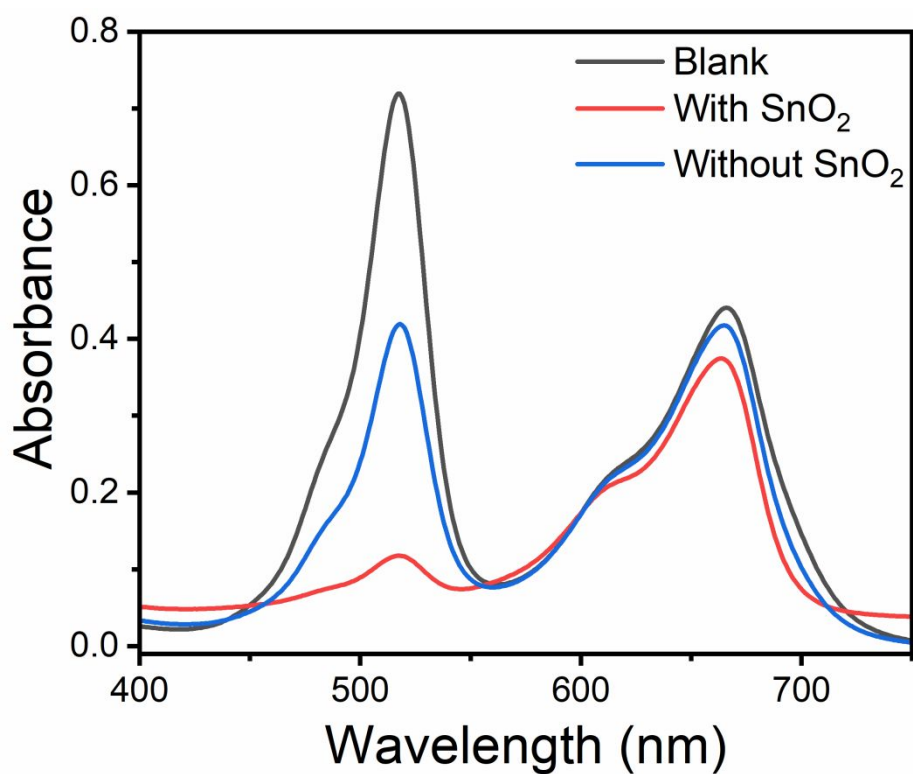

**Figure S5:** Photothermal effect on mixed dye (MB and EY) degradation under sunlight.

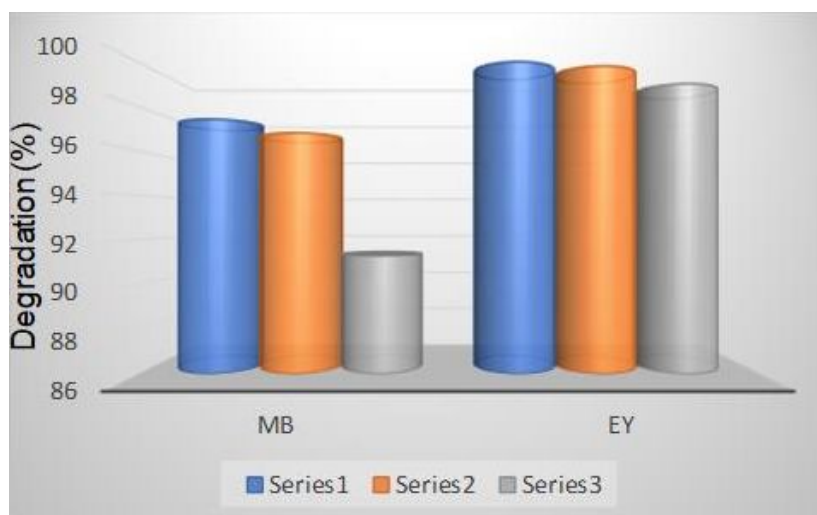

**Figure S6:** Reusability of the photocatalyst ( $\text{SnO}_2$  NPs) in MB and EY dyes under sunlight irradiation.

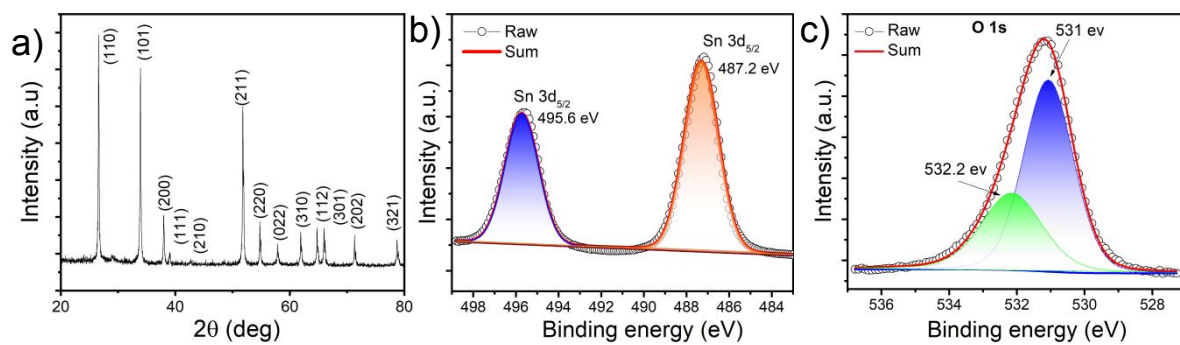

**Figure S7:** (a) XRD pattern and high-resolution XPS of SnO<sub>2</sub> after recycling; (b) Sn 3d and (c) O 1s.



## DFT calculation

Table S1. Eosin Y single negative

total energy = -11436.19787843786 Hartree

36

|    |           |            |            |
|----|-----------|------------|------------|
| Br | 8.3006022 | 7.5458619  | 3.2121600  |
| Br | 4.1376768 | 11.0879769 | 4.9488010  |
| Br | 9.8486302 | 4.1692881  | 5.7815506  |
| Br | 7.7144255 | 3.0180430  | 10.9791066 |
| O  | 7.7954899 | 6.3675380  | 5.9374872  |
| O  | 6.2647688 | 9.8522694  | 3.1293976  |
| O  | 9.4778521 | 2.7606386  | 8.4925567  |
| O  | 3.8083517 | 5.6439089  | 7.1881042  |
| H  | 3.2915566 | 5.1737223  | 6.5014199  |
| O  | 1.7710751 | 6.3820290  | 7.7494989  |
| C  | 6.9649355 | 7.4195951  | 5.7323722  |
| C  | 6.0319352 | 7.8046810  | 6.7474108  |
| C  | 5.9815086 | 7.0595013  | 7.9409989  |
| C  | 6.8556811 | 5.9733558  | 8.1271524  |
| C  | 7.7739850 | 5.6386931  | 7.0805839  |
| C  | 7.0467220 | 8.0962012  | 4.5313765  |
| C  | 6.2053089 | 9.2380135  | 4.2033826  |
| C  | 5.2736766 | 9.5929398  | 5.2854049  |
| C  | 5.1918410 | 8.9270561  | 6.4757093  |
| H  | 4.4806062 | 9.2481735  | 7.2365198  |
| C  | 5.0362658 | 7.4555565  | 9.0241192  |
| C  | 3.6508576 | 7.1755138  | 8.9968448  |
| C  | 2.8277363 | 7.6558849  | 10.0290103 |
| H  | 1.7603039 | 7.4355684  | 9.9845415  |
| C  | 3.3589859 | 8.3856304  | 11.0913554 |
| H  | 2.7054627 | 8.7444561  | 11.8895886 |
| C  | 4.7315261 | 8.6519538  | 11.1266836 |
| H  | 5.1622115 | 9.2228176  | 11.9527084 |
| C  | 5.5581890 | 8.1931137  | 10.0977432 |
| H  | 6.6270255 | 8.4159820  | 10.1170745 |
| C  | 2.9725672 | 6.3825918  | 7.9259862  |
| C  | 8.6467567 | 4.5753555  | 7.1978841  |
| C  | 8.7001258 | 3.7170517  | 8.3727441  |
| C  | 7.7262153 | 4.0995124  | 9.4075166  |
| C  | 6.8627174 | 5.1520750  | 9.2956752  |
| H  | 6.1623325 | 5.3783457  | 10.0992925 |

Table S2. Eosin Y two negative  
total energy = -11435.73175127406 Hartree

35

|    |           |            |            |
|----|-----------|------------|------------|
| Br | 8.4041776 | 7.6161794  | 3.2628068  |
| Br | 4.2371402 | 11.1802458 | 4.9458391  |
| Br | 9.8150550 | 4.1560465  | 5.8015343  |
| Br | 7.5537935 | 2.9741515  | 10.9386908 |
| O  | 7.7798698 | 6.3714147  | 5.9328993  |
| O  | 6.4179736 | 9.9666617  | 3.1721235  |
| O  | 9.3647057 | 2.7132729  | 8.4837048  |
| O  | 3.8536430 | 5.7291510  | 7.1553152  |
| O  | 1.8464551 | 5.8538839  | 8.1569974  |
| C  | 6.9773913 | 7.4474163  | 5.7339614  |
| C  | 6.0245301 | 7.8267254  | 6.7266483  |
| C  | 5.9062580 | 7.0505793  | 7.8999207  |
| C  | 6.7793332 | 5.9582494  | 8.0911329  |
| C  | 7.7157849 | 5.6273342  | 7.0656563  |
| C  | 7.1126580 | 8.1561984  | 4.5534001  |
| C  | 6.3074961 | 9.3218793  | 4.2270048  |
| C  | 5.3445645 | 9.6596403  | 5.2837220  |
| C  | 5.2099602 | 8.9637870  | 6.4534216  |
| C  | 5.0044922 | 7.4928930  | 9.0026087  |
| C  | 3.6601155 | 7.0859031  | 9.0840788  |
| C  | 2.8705120 | 7.5544725  | 10.1431346 |
| C  | 3.3955804 | 8.4099926  | 11.1141199 |
| C  | 4.7346071 | 8.8110482  | 11.0311426 |
| C  | 5.5329548 | 8.3540358  | 9.9786493  |
| C  | 3.0610464 | 6.1383737  | 8.0400507  |
| C  | 8.5770050 | 4.5520251  | 7.1927674  |
| C  | 8.5970258 | 3.6801912  | 8.3560998  |
| C  | 7.6074952 | 4.0660273  | 9.3710823  |
| C  | 6.7566313 | 5.1300161  | 9.2509310  |
| H  | 4.4705138 | 9.2647667  | 7.1953649  |
| H  | 1.8310510 | 7.2229602  | 10.1789219 |
| H  | 2.7658265 | 8.7643504  | 11.9347435 |
| H  | 5.1593407 | 9.4800547  | 11.7841298 |
| H  | 6.5778112 | 8.6672869  | 9.9095733  |
| H  | 6.0409979 | 5.3596314  | 10.0402169 |

Table S3. MB1+ single positive  
total energy = -1181.65969045672 Hartree  
38

|   |            |            |            |
|---|------------|------------|------------|
| S | -0.5685705 | 3.6651897  | 1.4950297  |
| C | 0.0600538  | 5.8915345  | 2.8611544  |
| C | 0.3630022  | 7.2734138  | 3.0287648  |
| C | 0.3821824  | 8.1075192  | 1.8525432  |
| C | 0.1168199  | 7.5831895  | 0.6184984  |
| C | -0.1905480 | 6.1969053  | 0.4252323  |
| N | -0.4353025 | 5.7789624  | -0.8166666 |
| C | -0.2075068 | 5.3686973  | 1.6067968  |
| C | -0.7331445 | 4.5203265  | -1.1390966 |
| C | -0.8378721 | 3.4199386  | -0.2114653 |
| C | -1.1533154 | 2.1406946  | -0.6385210 |
| C | -1.3868506 | 1.8658757  | -2.0166976 |
| C | -1.2841790 | 2.9605021  | -2.9498931 |
| C | -0.9721590 | 4.2197884  | -2.5197386 |
| N | -1.6945816 | 0.6225734  | -2.4398312 |
| C | -1.9335832 | 0.3528278  | -3.8563687 |
| C | -1.7949622 | -0.4773358 | -1.4848370 |
| N | 0.6243975  | 7.7896064  | 4.2472811  |
| C | 0.9355196  | 9.2088500  | 4.4068121  |
| C | 0.6026783  | 6.9341357  | 5.4303314  |
| H | 0.0351924  | 5.2262104  | 3.7217257  |
| H | 0.6094469  | 9.1677523  | 1.9377070  |
| H | 0.1311839  | 8.2144738  | -0.2716735 |
| H | -1.2205917 | 1.3441639  | 0.0996319  |
| H | -1.4551211 | 2.7924661  | -4.0108096 |
| H | -0.8943033 | 5.0481981  | -3.2260048 |
| H | -2.7852704 | 0.9418578  | -4.2360381 |
| H | -2.1666530 | -0.7113664 | -3.9807574 |
| H | -1.0421714 | 0.5863512  | -4.4624758 |
| H | -0.8378649 | -0.6338043 | -0.9585888 |
| H | -2.0498709 | -1.3980179 | -2.0229989 |
| H | -2.5811584 | -0.2813928 | -0.7358143 |
| H | 1.8429520  | 9.4837496  | 3.8433004  |
| H | 1.1121550  | 9.4164198  | 5.4688816  |
| H | 0.0994546  | 9.8410701  | 4.0636909  |
| H | -0.3923757 | 6.4788736  | 5.5719361  |
| H | 0.8370393  | 7.5383756  | 6.3147823  |
| H | 1.3512284  | 6.1274208  | 5.3499468  |
